# Supplementary material for: High frequency of antidrug antibodies and association of random drug levels with efficacy in certolizumab pegol-treated patients with rheumatoid arthritis: results from the BRAGGSS cohort
Source: PubMed Central journal article supplement (PMC5264213; doi:10.1136/annrheumdis-2015-208849), 2016-05-31
Supplement: annrheumdis-2015-208849supp_table.pdf [file annrheumdis-2015-208849supp_table.pdf]

**Supplementary Table: Certolizumab drug-levels and anti-drug antibodies in patients who developed reported adverse events during the study period**

| Patient                     | Reported adverse event details                               | Certolizumab drug level ( $\mu\text{g/mL}$ ) | ADAb level AU/ml |
|-----------------------------|--------------------------------------------------------------|----------------------------------------------|------------------|
| <b><u>Respiratory</u></b>   |                                                              |                                              |                  |
| 1                           | Sepsis requiring admission to hospital                       | 65                                           | 0                |
| 2                           | Pneumonia                                                    | 62                                           | 0                |
| 3                           | Chest infection                                              | 28                                           | 38               |
| 4*                          | Chest infection                                              | 46                                           | 0                |
| 5*                          | Chest infection (+inefficacy)                                | 2.6                                          | 70               |
| 6*                          | Exacerbation of Chronic Obstructive Airways Disease symptoms | 28                                           | 0                |
| 7                           | Chest symptoms- increased dyspnoea                           | 0.4                                          | 1600             |
| 8                           | Pneumonia                                                    | 4.3                                          | 500              |
| 9                           | Chest infection                                              | 35                                           | 0                |
| 10                          | Chest infection/possible progression of lung fibrosis        | 36                                           | 0                |
| <b><u>Urinary Tract</u></b> |                                                              |                                              |                  |
| 11                          | Urinary tract infection                                      | 94                                           | 0                |
| 12                          | Urinary tract infection                                      | 49                                           | 0                |
| 13                          | Urinary tract infection                                      | 34                                           | 0                |
| 14                          | Recurrent urinary tract infections                           | 26                                           | 0                |
| 15                          | Recurrent urinary tract infections                           | 54                                           | 0                |
| <b><u>Miscellaneous</u></b> |                                                              |                                              |                  |
| 16                          | Irregular heart rate, lethargy, unwell                       | 0                                            | 190              |
| 17                          | Rash over face                                               | 10                                           | 640              |
| 18                          | Flu –like symptoms                                           | 25                                           | 210              |
| 19                          | Recurrent eye cysts                                          | 41                                           | 0                |
| 20                          | Sore throat (leading to temporary discontinuation)           | 35                                           | 0                |
| 21*                         | Patient reported unwell                                      | 0.2                                          | 0                |
| 22                          | Reported adverse event (no details)                          | 16                                           | 35               |
| 23*                         | Reported adverse event (no details)                          | 44                                           | 2                |
| 24*                         | Bilateral oedema and fatigue                                 | 32                                           | 0                |

Whilst certolizumab drug levels were not performed at the time of the event, the results of the closest serum sample to the date of the adverse event are reported above. Whilst the majority of above events led to temporary discontinuation, those marked with (\*) led to permanent discontinuation.
